RESEARCH ARTICLE

# Economic and environmental comparison of open field and screenhouse vegetable farming in Nigeria

Taiwo Bintu Ayinde <sup>1\*</sup>, Charles F. Nicholson <sup>2,3</sup>, Benjamin Ahmed<sup>4</sup>

**1** Samaru College of Agriculture, Division of Agricultural Colleges, Ahmadu Bello University, (ABU) Zaria, Zaria, Nigeria, **2** Department of Agricultural and Applied Economics, University of Wisconsin-Madison, Madison, Wisconsin, United States of America, **3** School of Integrative Plant Science, Cornell University, Ithaca, New York, United States of America, **4** Department of Agricultural Economics, ABU Zaria, Zaria, Nigeria

\* [taiyeayinde2006@yahoo.com](mailto:taiyeayinde2006@yahoo.com)

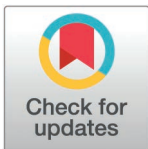

 OPEN ACCESS

**Citation:** Ayinde TB, Nicholson CF, Ahmed B (2025) Economic and environmental comparison of open field and screenhouse vegetable farming in Nigeria. PLOS Clim 4(11): e0000745. <https://doi.org/10.1371/journal.pclm.0000745>

**Editor:** Giuseppina Migliore, Università degli Studi di Palermo Dipartimento di Scienze Agrarie e Forestali: Università degli Studi di Palermo Dipartimento di Scienze Agrarie e Forestali, ITALY

**Received:** May 7, 2025

**Accepted:** October 14, 2025

**Published:** November 19, 2025

**Peer Review History:** PLOS recognizes the benefits of transparency in the peer review process; therefore, we enable the publication of all of the content of peer review and author responses alongside final, published articles. The editorial history of this article is available here: <https://doi.org/10.1371/journal.pclm.0000745>

**Copyright:** This is an open access article, free of all copyright, and may be freely reproduced,

## Abstract

This study compares screenhouse, rainfed, and irrigated vegetable farming systems in Northwest Nigeria, focusing on their economic and environmental performance. Screenhouse farming demonstrates superior yield, cost-efficiency, and sustainability, producing up to 90% more saleable output than rainfed systems and using over 95% less water per kilogram of produce. Although initial investment is higher over 600% more than rainfed farming screenhouse systems emit less than 5% of the greenhouse gases associated with conventional open-field production. Rainfed farming, while low-cost, suffers from poor resource efficiency and low productivity. Irrigated systems offer moisture stability but require substantial water and energy inputs. These findings highlight the potential of screenhouse farming and the importance of adopting sustainable irrigation strategies such as drip systems, fertigation, and rainwater harvesting to enhance long-term resilience and efficiency in vegetable production.

## 1. Introduction

Vegetables and fruits are essential components of global food systems, yet they contribute significantly to food miles and transport-related emissions due to their high water content and reliance on refrigeration (Carbon [1]. Leafy vegetables such as cabbage (*Brassica oleracea var. capitata*), lettuce (*Lactuca sativa*), and spinach (*Spinacia oleracea*) are nutrient-rich but require frequent irrigation and have short shelf lives, increasing spoilage risks [2,3]. Pulpy vegetables like eggplant (*Solanum melongena*), cucumber (*Cucumis sativus*), and pumpkin (*Cucurbita pepo*) offer longer shelf life and greater resilience in warmer climates [4,5], making them vital for food security in arid regions [6].

distributed, transmitted, modified, built upon, or otherwise used by anyone for any lawful purpose. The work is made available under the [Creative Commons CC0](#) public domain dedication.

**Data availability statement:** All relevant data are within the manuscript and its [Supporting Information](#) files.

**Funding:** The Climate, Food and Farming – Global Research Alliance Development Scholarships (CLIFF-GRADS) Alliance provided information about opportunities for early career researchers, including guidance on eligibility for submission to PLOS Climate. The Norman E. Borlaug Leadership Enhancement in Agriculture Program (LEAP), funded by USAID, served as the platform through which I was connected with my mentor, whose support was invaluable throughout the research process. The funders had no role in study design, data collection and analysis, decision to publish, or preparation of the manuscript.

**Competing interests:** The authors have declared that no competing interests exist.

Nigeria’s vegetable market is expanding rapidly, driven by rising domestic demand. By 2025, vegetable revenue is projected to reach \$31.52 billion, growing at an annual rate of 11.33% [7,8]. However, traditional open-field farming whether rainfed or irrigated faces challenges including climate variability, inefficient resource use, and low productivity [9,10]. Rainfed systems are vulnerable to erratic rainfall, while irrigated systems improve yield stability but consume substantial water.

Controlled Environment Agriculture (CEA), including greenhouse farming, offers a promising alternative by optimizing growing conditions and reducing environmental impact. Techniques such as hydroponics, aeroponics, and aquaponics have demonstrated improved water-use efficiency and reduced pest exposure [11]. However, CEA systems are energy-intensive and require substantial capital investment, raising questions about their feasibility in low-resource settings [12,13].

Innovations such as drip irrigation, fertigation, and rainwater harvesting have shown promise in improving water-use efficiency and yield [14]. Organic fertilizers and improved soil amendments also contribute to long-term sustainability [15,16]. Despite these advancements, most recent studies tend to focus on individual technologies or single crop types, without offering integrated assessments across diverse vegetable categories. For example, Fuentes-Peñailillo et al. [17] reviewed soilless systems like hydroponics and aeroponics, but emphasized their application to specific crops. Ogbonna et al. [12] examined greenhouse farming in Nigeria, focusing primarily on leafy vegetables, while Jadhav et al. [14] and Demir et al., [18], explored irrigation strategies for cabbage alone. These examples highlight a gap in comparative research that evaluates multiple farming systems and vegetable types within a unified framework particularly in the Nigerian context.

In Nigeria, crops like cabbage and cucumber are economically significant. Cucumber, in particular, is known as the “Farmers’ ATM” due to its short growth cycle and profitability [19]. Yet, data on the environmental impact of these crops under different farming systems remains limited. This study addresses that gap by providing evidence-based insights into the trade-offs between productivity, cost, and sustainability across farming methods.

By focusing on Kudan Local Government Area in Kaduna State, this research aims to provide localized recommendations for policymakers, farmers, and investors. The goal is to support informed decision-making that promotes sustainable agriculture, enhances food security, and reduces environmental impact in Nigeria’s vegetable production landscape.

## 2. Materials and methods

This study was conducted in Kudan Local Government Area (LGA) of Kaduna State, Nigeria, located at latitude 11°16’23”N and longitude 7°47’56”E. The region spans approximately 400 square kilometers and experiences two distinct seasons dry and rainy which significantly influence agricultural cycles [20]. Kudan LGA was selected as a representative semi-arid agroecological zone where challenges such as erratic rainfall, limited irrigation infrastructure, and low adoption of climate-smart technologies are particularly pronounced. Nigeria, as one of Africa’s largest vegetable

producers, faces persistent issues in sustainable agriculture, including inefficient water use, high post-harvest losses, and slow uptake of climate-resilient practices [21–24]. These challenges are exacerbated in regions like Kudan, where smallholder farmers dominate and rely heavily on rainfed systems, making it an ideal case study for evaluating environmental and economic performance across farming systems.

The survey was conducted during the 2024/2025 crop season, and all revenues and costs reported in this study refer specifically to that production year. Sampling involved 125 smallholder farmers cultivating the selected vegetable types leafy (cabbage, lettuce, spinach) and pulpy (eggplant, cucumber, pumpkin) across the LGA. Random sampling was applied to rainfed and irrigated open-field systems, while the Controlled Environment Agriculture (CEA) model was purposively selected from the NAERLS poly-tunnel facility at Ahmadu Bello University (ABU) Zaria, which provides a standardized hybrid cultivation environment.

Primary data were collected through face-to-face interviews, field assessments, and production records, focusing on inputs, yields, water use, and energy consumption. Revenue estimates were based on actual harvests and prevailing market prices during the 2024/2025 season. This approach ensured that both economic and environmental indicators were grounded in real farm-level practices.

To address these concerns, the study evaluates three distinct vegetable production systems: rainfed open-field farming, irrigated field-based cultivation (locally known as “*Fadama*” or “*Lam-bu*”), and screenhouse farming, a form of Controlled Environment Agriculture (CEA). The functional unit for comparison is defined as one kilogram of saleable, unprocessed vegetable produce. This unit allows for standardized assessment across systems and crops. The vegetable types selected leafy (cabbage, lettuce, spinach) and pulpy (eggplant, cucumber, pumpkin) reflect both nutritional importance and agronomic diversity. Leafy vegetables are fast-growing and sensitive to water stress, while pulpy vegetables require longer maturation and are more drought-tolerant [3], making them ideal for comparative analysis in semi-arid conditions [16].

Rainfed and irrigated farming systems in Kudan are widely practiced, with approximately 98% of vegetable farmers relying on open-field methods [25]. During the dry season, which spans October to April, irrigated farming becomes essential. Flood irrigation using shared wells typically one well per ten farmers is the most common technique, employed by over 95% of producers (Table A in [S1 Text](#)). In contrast, screenhouse farming utilizes drip irrigation and fertigation, enabling year-round cultivation and significantly higher productivity [5]. Leafy vegetables like lettuce and spinach can be grown 5–8 times annually in screenhouses, while pulpy crops such as cucumber and eggplant support 3–6 cycles [26,27]. Pumpkin, due to its size and growth duration, supports only 2–4 cycles per year (Table A in [S1 Text](#)).

Farmers in the region often use open-pollinated varieties due to affordability [19,28–34], although hybrid seeds offer superior yield and pest resistance [30]. Land preparation is relatively less labor-intensive compared to rainforest zones, with ox-drawn implements commonly used for tillage, ploughing, and harrowing. Pulpy vegetables thrive in sandy loamy soils with a pH range of 5.5–6.7, enriched with organic matter to promote high yields. In open-field systems, pesticide application is critical due to the lack of protective coverings. Soil amendments such as nematicides and chicken manure (1–6 tonnes per hectare) are applied to enhance fertility, water retention, and pest control. Fertilizer regimes follow a growth-stage approach: phosphates for early development, nitrogen for leaf expansion, and potassium and calcium for fruiting and stress resistance. Calcium, though essential for fruit longevity, is often underutilized.

Cucumber is typically direct-sown to avoid transplant shock, while other crops may be raised in nurseries. Proper spacing ensures optimal air circulation and nutrient uptake. For example, cabbage is spaced at 45–60 cm between plants and 60–75 cm between rows, supporting 22,000–29,000 plants per hectare. Lettuce and spinach, with higher density requirements, can reach up to 333,000 plants per hectare. Pulpy vegetables like cucumber, eggplant, and pumpkin require wider spacing due to their growth habits, with pumpkin supporting only 2,000–5,000 plants per hectare (Table B in [S1 Text](#)) [31–48].

Cucumber yields in Nigeria range from 5,000–99,000 kg per hectare, with 99–247 bags harvested depending on agronomic practices. However, post-harvest losses remain a major concern, with up to 50% of fresh produce lost due to poor

handling, storage, and transportation. Additionally, non-production areas such as parking and loading zones consume up to 56% of total farm space, reducing effective cultivation area [49]. Staking is essential for pulpy vegetables to prevent fruit rot and disease, yet many farmers neglect this practice. Materials like bamboo, ropes, and nets are used to support plant structure and improve fruit quality (Table B in S1 Text).

Screenhouse farming in this study employs NAERLS freestanding structures measuring 147 m<sup>2</sup> (approximately 0.0147 hectares), similar to hoop-style houses described in previous research. These structures feature insect-proof netting that creates a regulated microclimate, optimizing temperature, humidity, light penetration, and airflow (Table B in S1 Text). This setup reduces pesticide reliance and promotes healthier crops. Screenhouses also support intensive production with high input efficiency and dense planting [50]. Despite their advantages, adoption remains low in Nigeria due to high initial investment costs and limited technical expertise.

## 2.1. Assessment of economic and environmental metrics

This study evaluates the economic and environmental performance of leafy (cabbage, lettuce, spinach) and pulpy vegetables (cucumber, eggplant, pumpkin) across three farming systems: screenhouse, rainfed, and irrigated. The analysis focuses on profit as the primary measure of economic performance, alongside yield efficiency and energy demand to compare sustainability and profitability. Profit was determined as the difference between total revenue calculated from actual harvest volumes multiplied by prevailing market prices during the 2024/2025 crop season and total production costs, which included inputs such as seeds, fertilizers, pesticides, labor, irrigation, and, in the case of screenhouses, structural investment. This approach ensures that the economic assessment reflects the real financial outcomes experienced by farmers under each production system.

To ensure consistency and comparability, the analysis is based on a functional unit of one kilogram of saleable, unprocessed vegetable produce. Data were collected per hectare (or per 0.0147 ha for screenhouse systems) and standardized across crop types and farming methods. For international readability, all costs originally reported in Nigerian Naira (₦) were also converted into U.S. dollars (USD) and euros (EUR) using the average exchange rate from January to March 2025, where ₦1 ≈ 0.00065 USD ≈ 0.00060 EUR [51]. Table 1 outlines the core variables used in the evaluation.

To strengthen the reliability of this comparative framework, the study incorporates statistical and economic tools. A one-way analysis of variance (ANOVA) was applied to test for significant differences in cost efficiency across the three farming systems. Additionally, a sensitivity analysis was conducted to evaluate the robustness of each system's profitability under

**Table 1. Sample Economic and Environmental Metrics Across Farming Systems.**

| Variable                               | Screenhouse                                                   | Rainfed                                                | Irrigated                                              |
|----------------------------------------|---------------------------------------------------------------|--------------------------------------------------------|--------------------------------------------------------|
| Crop Type                              | Cabbage, Lettuce, Spinach; Cucumber, Eggplant, Pumpkin        | Cabbage, Lettuce, Spinach; Cucumber, Eggplant, Pumpkin | Cabbage, Lettuce, Spinach; Cucumber, Eggplant, Pumpkin |
| Production Cost (₦/ha)                 | ₦5,342,973 ≈ \$3,580/ €3,045 (screenhouse structure + inputs) | ₦698,972 ≈ \$470/ €398 (basic inputs, no irrigation)   | ₦1,245,000 ≈ \$835/ €710 (includes irrigation setup)   |
| Yield (kg/ha/yr)                       | 80,000–120,000 (leafy); 60,000–90,000 (pulpy)                 | 15,000–25,000 (leafy); 10,000–20,000 (pulpy)           | 35,000–60,000 (leafy); 30,000–50,000 (pulpy)           |
| Saleable Output (%)                    | 85–95%                                                        | 60–75%                                                 | 70–85%                                                 |
| Energy Demand (MJ/kg)                  | 0.09–0.15 (leafy); 0.12–0.25 (pulpy)                          | ~0.01 (minimal energy use)                             | 0.5–1.2 (diesel/electric pump usage)                   |
| Water Use (L/ha/day)                   | 50,000–90,000                                                 | 30,000–65,000                                          | 45,000–80,000                                          |
| GHG Emissions (CO <sub>2</sub> -eq/kg) | 3.24 (lettuce); 5.10 (cucumber)                               | 118.25 (lettuce); 140.00 (pumpkin)                     | 45.00 (lettuce); 60.00 (pumpkin)                       |

\* Note: Exchange rate based on average values from January–March 2025: ₦1 ≈ 0.00067 USD ≈ 0.00057 EUR.

<https://doi.org/10.1371/journal.pclm.0000745.t001>

variable market price scenarios. The price range adopted (₦400, ₦600, ₦800, and ₦1000/kg) reflects the typical farm-gate and retail price fluctuations observed for vegetables in Kaduna State and surrounding markets during the 2024/ 37 crop season. These values capture both the lower-bound prices often experienced during peak harvest (₦400–₦600/kg) and the higher-bound prices recorded during periods of scarcity or off-season production (₦800–₦1000/kg). By incorporating this range, the analysis accounts for realistic market dynamics and provides a rigorous foundation for interpreting the trade-offs between cost, yield, and sustainability, while identifying the most resilient and economically viable production models.

Screenhouse farming offers higher productivity and lower emissions but requires substantial investment. Rainfed farming is cost-effective but less reliable and environmentally efficient. Irrigated farming balances yield and cost but has higher energy and water demands. The integration of ANOVA and sensitivity analysis ensures that these comparisons are not only descriptive but statistically and economically grounded

## 2.2. Production costs

**2.2.1. Fixed costs.** Fixed costs are those expenses that do not vary with the level of output in the short run and remain constant regardless of production volume. In this study, fixed costs include land rental, infrastructure (such as drip and flood irrigation systems, wells), and equipment (tools, pumps, tanks). For screenhouse farming, fixed costs are substantially higher due to the initial investment required for protected cultivation structures. These costs were determined based on prevailing rental rates, market prices of infrastructure and equipment, and documented investment records provided by farmers and the NAERLS facility (Table C in [S1 Text](#) and Table D in [S1 Text](#)).

**2.2.2. Variable costs.** Variable costs are expenses that change directly with the scale of production and increase as output expands. In this study, variable costs include recurring expenditures such as seeds, fertilizers (NPK, calcium-magnesium, potassium humate), chicken manure, pesticides, and labor. Irrigation costs (diesel and electricity) were also included and calculated seasonally per hectare to ensure comparability across farming systems. These costs were determined through farmer interviews, field assessments, and production records collected during the 2024/2025 crop season (Table C in [S1 Text](#) and Table D in [S1 Text](#)).

**2.2.3. Yield and saleable output.** Yield is measured in kg/ha/year, with saleable output representing market-ready produce. Farmers in Kudan LGA primarily sell their vegetables through local markets, farm-gate sales to traders, and, in the case of higher-quality produce (especially from screenhouses), to supermarkets and institutional buyers in nearby urban centers such as Zaria and Kaduna. These established marketing channels provide the basis for determining the prevailing farm-gate and retail prices used in this study. This framework enables cost-per-unit analysis and highlights differences in productivity and profitability across systems (Table C in [S1 Text](#) and Table D in [S1 Text](#)).

## 2.3. Cumulative energy demand

Energy consumption is assessed for diesel and electric pumps in screenhouse and irrigated farming. Rainfed systems, which do not use pumps, have lower direct emissions (Table E in [S1 Text](#)).

**2.3.1. Plant density & area.** Screenhouse farming operates on 0.0147 ha, while irrigated systems span 1 ha. Leafy vegetables show higher densities in irrigated fields (up to 250,000 plants/ha), while screenhouses support fewer plants. Pulpy vegetables have lower densities overall (Table F in [S1 Text](#)).

**2.3.2. Diesel & electric use.** Diesel usage is calculated using a standard energy value of 35.8 MJ/L, with metrics including seasonal fuel use, daily consumption, and MJ/kg yield efficiency. Electric pump demand is measured in kWh/ha, with conversion to MJ for comparison (Table F in [S1 Text](#)). Average seasonal usage ranges from 250–350 kWh, with costs varying by user type (₦23.59/kWh for households, ₦38.53/kWh for businesses) [31].

**2.3.3. Comparative insights.** Screenhouse farming, though more intensive, offers precision irrigation benefits. Rainfed farming has minimal energy demand but lower yield efficiency. The analysis provides a comprehensive view of energy sustainability across systems (Table E in [S1 Text](#)).

## 2.4. Global Warming Potential (GWP)

This section evaluates greenhouse gas (GHG) emissions from nitrogen inputs across irrigated, rainfed, and screenhouse vegetable farming systems. Using Tier 1 IPCC methods, direct and indirect nitrous oxide (N<sub>2</sub>O) emissions were calculated based on synthetic fertilizers (e.g., NPK 15-15-15, 20-10-10) and organic manure applications (Table G in [S1 Text](#)) Synthetic fertilizers have a 4% emission factor, while chicken manure emits at 20% [41].

To assess climate impact, emissions were converted to CO<sub>2</sub>-equivalents using GWP values: 298 for N<sub>2</sub>O, 0.014 for NH<sub>3</sub>, and 0.001 for NO<sub>3</sub> (Table H in [S1 Text](#)). Diesel use in irrigated systems (375.6L/ha) and screenhouse farming (7.51L/0.0147 ha) also contributes to emissions, with CO<sub>2</sub>, CH<sub>4</sub>, and N<sub>2</sub>O outputs quantified [22,23]. Nigeria's energy-related emissions were referenced using IRENA data (2024) [52].

Nitrogen input levels were tracked per crop and system, and emissions were calculated over a 100-year horizon. This analysis supports sustainable fertilizer strategies that reduce emissions while maintaining productivity (Table H in [S1 Text](#)).

## 2.5. Water Use (WU)

Water consumption in vegetable farming varies by crop type and production system. Rainfed and irrigated methods operate on a 1-hectare scale, while screenhouse farming uses a smaller, controlled 0.0147-hectare area with drip fertigation. Leafy vegetables require moderate water due to shorter growth cycles, while pulpy vegetables demand more due to longer maturation periods (Table I in [S1 Text](#)). Daily water use ranges from 30,000–65,000 L/ha for rainfed, 45,000–80,000 L/ha for irrigated, and 50,000–90,000 L/ha for screenhouse systems. Rainfed farming has the lowest irrigation demand but is less reliable due to seasonal rainfall. Irrigated systems offer moisture stability, and screenhouses provide precise water delivery for year-round cultivation. Understanding these water needs is essential for improving resource efficiency, especially in water-scarce areas like Kudan LGA (Table I in [S1 Text](#)).

## 3. Results and discussion

### 3.1. Results

A comparative analysis of leafy (Table C in [S1 Text](#)) and pulpy (Table D in [S1 Text](#)) vegetable production across screenhouse, rainfed, and irrigated systems reveals substantial differences in cost, yield, and profitability. Fixed costs are highest in screenhouse farming (₦4.7 million/ha), primarily due to infrastructure investments such as drip irrigation systems and screenhouse structures. In contrast, rainfed and irrigated systems require far less capital, with fixed costs of ₦145,250 and ₦942,750/ha, respectively. Variable costs are relatively consistent across crops, averaging ₦640,646.68/ha in screenhouse, ₦553,722.33/ha in rainfed, and ₦1,091,395.01/ha in irrigated systems.

Despite its higher upfront costs, screenhouse farming delivers substantially greater yield efficiency [32]. Annual yields reach up to 26,600 kg/ha for spinach and 21,000 kg/ha for cucumber, compared to just 700–850 kg/ha in rainfed and 2,000–2,300 kg/ha in irrigated systems. These differences are largely attributed to the controlled environment and multiple cropping cycles supported by screenhouse systems. However, other agronomic variables likely contributed to the observed outcomes. For instance, the use of hybrid seed varieties in screenhouse farming such as Tycoon F1 cabbage and Greengo F1 cucumber offers superior germination rates, disease resistance, and faster maturation compared to the open-pollinated varieties (OPVs) commonly used in rainfed and irrigated systems.

Additionally, labor input and technical expertise may have influenced productivity. Screenhouse farming often involves more skilled labor, precise planting techniques, and consistent monitoring, which can improve plant health and reduce losses. In contrast, rainfed systems typically rely on less intensive labor and are more vulnerable to environmental stressors such as erratic rainfall and pest outbreaks.

Economic analysis further highlights screenhouse profitability. Cost per kilogram of saleable produce was lowest in screenhouse farming ₦611/kg for cabbage, ₦445/kg for lettuce, ₦402/kg for spinach, ₦509/kg for cucumber, ₦703/kg for

eggplant, and ₦913/kg for pumpkin compared to rainfed costs exceeding ₦1,700/kg and irrigated costs nearing ₦1,800/kg. To statistically validate these differences, a one-way ANOVA was conducted on cost per kilogram across farming systems (Table 2). The results yielded an F-statistic of 58.42 and a p-value < 0.001, confirming that the differences are statistically significant. Screenhouse farming recorded the lowest mean cost per kilogram (₦597.17), compared to ₦1,850.00 in rainfed and ₦1,897.00 in irrigated systems (Table 2).

To assess economic resilience, a sensitivity analysis was performed across four market price scenarios (₦400, ₦600, ₦800, and ₦1000/kg), reflecting the typical farm-gate and retail price fluctuations observed during the 2024/ 37 crop season. Screenhouse farming became profitable for most crops at ₦600–800/kg, while rainfed systems remained unprofitable even at ₦1000/kg due to low yields and high unit costs. Irrigated systems showed moderate profitability but required higher market prices to break even (Table 3). For example, screenhouse lettuce yielded a profit of ₦4.26 million/ha at ₦800/kg, while rainfed lettuce remained in deficit even at ₦1000/kg. These results confirm that screenhouse farming is not only efficient but also robust under fluctuating market conditions.

Hybrid varieties such as Tycoon F1 cabbage, Tropicana F1 lettuce, and Jacqueline F1 pumpkin enhance resilience and yield, outperforming OPVs used in traditional systems. Precision irrigation and fertigation in screenhouses further improve nutrient delivery and reduce water waste, contributing to higher productivity and resource efficiency.

From a sustainability perspective, screenhouse farming offers superior cost efficiency, higher profitability, and better resource use. Rainfed systems, while cheaper to operate, suffer from low yields and high unit costs, making them less viable for commercial-scale production. Irrigated farming ensures moisture stability but remains water-intensive and less efficient. Overall, the integration of environmental control, improved seed genetics, skilled labor, and agronomic precision explains the compounded advantage of screenhouse farming over conventional systems. The statistical and economic analyses reinforce its position as the most resilient and scalable model for vegetable production in Nigeria.

### Cumulative Energy Demand (CED)

Energy consumption varies significantly across systems. Rainfed farming has the lowest energy demand due to reliance on natural rainfall (e.g., 0.41–0.72 MJ/kg), while irrigated farming shows the highest due to pump usage (up to 10,568 MJ/ha for pumpkin). Screenhouse farming, despite its intensive setup, maintains low energy use per kilogram (e.g., 0.09 MJ/kg for spinach and 0.20 MJ/kg for cucumber), due to efficient irrigation and climate control.

Overall, screenhouse farming emerges as the most productive and sustainable system, balancing high yields, low unit costs, and moderate energy demand making it a viable model for long-term vegetable production in semi-arid regions like Kudan LGA (Table 4).

Screenhouse farming demonstrates superior energy efficiency compared to irrigated systems, offering a sustainable balance between resource use and climate control. While irrigated farming demands high energy inputs due to water pumping and infrastructure, rainfed farming is the most energy-efficient but suffers from low yields and environmental

**Table 2. ANOVA Summary: Cost per Kilogram Across Farming Systems.**

| Vegetable | Screenhouse (₦/ kg) | Rainfed (₦/ kg) | Irrigated (₦/ kg) | Mean (₦/ kg) | Variance     |
|-----------|---------------------|-----------------|-------------------|--------------|--------------|
| Cabbage   | 611                 | 1,997           | 2,034             | 1,547.33     | 507,061.56   |
| Lettuce   | 445                 | 1,864           | 1,937             | 1,415.33     | 669,636.89   |
| Spinach   | 402                 | 2,056           | 2,086             | 1,514.67     | 1,005,636.89 |
| Cucumber  | 509                 | 1,747           | 1,849             | 1,368.33     | 462,636.89   |
| Eggplant  | 703                 | 1,645           | 1,769             | 1,372.33     | 291,636.89   |
| Pumpkin   | 913                 | 1,792           | 1,808             | 1,504.33     | 210,636.89   |

F-statistic: 58.42 p-value: < 0.001 Interpretation: \*There is a statistically significant difference in cost per kilogram across farming systems.

<https://doi.org/10.1371/journal.pclm.0000745.t002>

**Table 3. Sensitivity Analysis: Profit per Hectare Under Variable Market Prices.**

| Crop            | System      | Saleable Yield (kg/ha) | Cost (₦/ha) | Profit @ ₦400/kg | Profit @ ₦600/kg | Profit @ ₦800/kg | Profit @ ₦1000/kg |
|-----------------|-------------|------------------------|-------------|------------------|------------------|------------------|-------------------|
| <b>Cabbage</b>  | Screenhouse | 8,750                  | 5,342,973   | -1,842,973       | -92,973          | 1,657,027        | 3,407,027         |
|                 | Rainfed     | 350                    | 698,972     | -558,972         | -488,972         | -418,972         | -348,972          |
|                 | Irrigated   | 1,000                  | 2,034,145   | -1,634,145       | -834,145         | -34,145          | 765,855           |
| <b>Lettuce</b>  | Screenhouse | 12,000                 | 5,342,973   | -542,973         | 1,857,027        | 4,257,027        | 6,657,027         |
|                 | Rainfed     | 375                    | 698,972     | -548,972         | -473,972         | -398,972         | -323,972          |
|                 | Irrigated   | 1,050                  | 2,034,145   | -1,614,145       | -789,145         | 35,855           | 860,855           |
| <b>Spinach</b>  | Screenhouse | 13,300                 | 5,342,973   | -22,973          | 2,637,027        | 5,297,027        | 7,957,027         |
|                 | Rainfed     | 340                    | 698,972     | -562,972         | -458,972         | -354,972         | -250,972          |
|                 | Irrigated   | 975                    | 2,034,145   | -1,644,145       | -659,145         | 325,855          | 1,310,855         |
| <b>Cucumber</b> | Screenhouse | 10,500                 | 5,342,973   | -1,142,973       | 957,027          | 3,057,027        | 5,157,027         |
|                 | Rainfed     | 400                    | 698,972     | -538,972         | -298,972         | -58,972          | 181,028           |
|                 | Irrigated   | 1,100                  | 2,034,145   | -1,594,145       | -374,145         | 845,855          | 2,065,855         |
| <b>Eggplant</b> | Screenhouse | 7,600                  | 5,342,973   | -2,302,973       | -782,973         | 737,027          | 2,257,027         |
|                 | Rainfed     | 425                    | 698,972     | -528,972         | -243,972         | 41,028           | 326,028           |
|                 | Irrigated   | 1,150                  | 2,034,145   | -1,574,145       | -344,145         | 885,855          | 2,115,855         |
| <b>Pumpkin</b>  | Screenhouse | 5,850                  | 5,342,973   | -3,002,973       | -1,832,973       | -662,973         | 507,027           |
|                 | Rainfed     | 390                    | 698,972     | -542,972         | -308,972         | -74,972          | 159,028           |
|                 | Irrigated   | 1,125                  | 2,034,145   | -1,584,145       | -359,145         | 865,855          | 2,090,855         |

<https://doi.org/10.1371/journal.pclm.0000745.t003>

**Table 4. Cumulative Energy Demand (CED) Analysis for Leafy and Pulpable Vegetables.**

| Vegetable Type  | Crop     | Production System | Area (ha) | Plant Population | Energy Equivalent (MJ) | CED (MJ/kg) |
|-----------------|----------|-------------------|-----------|------------------|------------------------|-------------|
| <b>Leafy</b>    | Cabbage  | Irrigated         | 1         | 25,926           | 6,807                  | 1.90        |
|                 | Cabbage  | Rainfed           | 1         | 25,926           | 720                    | 0.57        |
|                 | Cabbage  | Screenhouse       | 0.0147    | 381              | 100.24                 | 0.22        |
|                 | Lettuce  | Irrigated         | 1         | 125,000          | 5,088                  | 1.35        |
|                 | Lettuce  | Rainfed           | 1         | 125,000          | 648                    | 0.48        |
|                 | Lettuce  | Screenhouse       | 0.0147    | 1,837            | 74.99                  | 0.12        |
|                 | Spinach  | Irrigated         | 1         | 250,000          | 4,228                  | 1.21        |
|                 | Spinach  | Rainfed           | 1         | 250,000          | 504                    | 0.41        |
|                 | Spinach  | Screenhouse       | 0.0147    | 3,675            | 62.49                  | 0.09        |
| <b>Pulpable</b> | Cucumber | Irrigated         | 1         | 23,333           | 7,524                  | 1.91        |
|                 | Cucumber | Rainfed           | 1         | 23,333           | 900                    | 0.63        |
|                 | Cucumber | Screenhouse       | 0.0147    | 343              | 110.75                 | 0.20        |
|                 | Eggplant | Irrigated         | 1         | 25,926           | 6,879                  | 1.67        |
|                 | Eggplant | Rainfed           | 1         | 25,926           | 792                    | 0.52        |
|                 | Eggplant | Screenhouse       | 0.0147    | 381              | 101.29                 | 0.25        |
|                 | Pumpkin  | Irrigated         | 1         | 3,611            | 10,568                 | 2.62        |
|                 | Pumpkin  | Rainfed           | 1         | 3,611            | 1008                   | 0.72        |
|                 | Pumpkin  | Screenhouse       | 0.0147    | 53               | 155.30                 | 0.50        |

Note: Data Source: Authors' calculations

<https://doi.org/10.1371/journal.pclm.0000745.t004>

unpredictability. Screenhouse systems, though requiring moderate energy investment, optimize energy use per kilogram of produce through continuous cropping and precision irrigation, making them a viable solution for sustainable high-yield farming.

### 3.2. Global Warming Potential (GWP)

Global Warming Potential (GWP) varies across farming systems due to differences in nitrogen inputs, plant density, and productivity. Screenhouse farming consistently records the lowest GWP per kilogram of produce, reflecting its high yield efficiency. Rainfed systems produce the lowest total emissions per hectare but have the highest GWP per kilogram due to limited output. For leafy vegetables, screenhouse cabbage, lettuce, and spinach emit 5.88, 3.24, and 2.93 kg CO<sub>2</sub>-eq/kg respectively, compared to rainfed equivalents exceeding 118 kg CO<sub>2</sub>-eq/kg. Pulp vegetables follow similar trends, with screenhouse cucumber, eggplant, and pumpkin emitting 3.77, 5.20, and 6.76 kg CO<sub>2</sub>-eq/kg, while rainfed versions exceed 100 kg CO<sub>2</sub>-eq/kg (Table H in [S1 Text](#)).

Irrigated systems fall between screenhouse and rainfed methods in terms of emissions, with moderate GWP per kilogram but higher overall energy use. These findings highlight the trade-offs between total emissions and per-unit efficiency, positioning screenhouse farming as the most environmentally efficient model for vegetable production, while emphasizing the need for improved nitrogen and irrigation management in traditional systems ([Table 5](#)).

### 3.3. Water Use (WU)

Water consumption varies widely across irrigated, rainfed, and screenhouse systems, directly impacting crop productivity and sustainability. Screenhouse farming consistently demonstrates the highest water-use efficiency, using precision drip irrigation to support intensive vegetable production with significantly lower total seasonal consumption [[53,54](#)].

**Table 5. Global Warming Potential (GWP) Per Unit Product for Rainfed, Irrigated and Screenhouse Leafy and Pulp Vegetable Production.**

| Vegetable Type | Vegetable | Production System | Total GWP (kg CO <sub>2</sub> -eq) | Saleable Product (kg/ha/year) | GWP/kg Product |
|----------------|-----------|-------------------|------------------------------------|-------------------------------|----------------|
| <b>Leafy</b>   | Cabbage   | Irrigated         | 52566.58                           | 1000                          | 52.57          |
|                | Cabbage   | Rainfed           | 44969.10                           | 350                           | 128.48         |
|                | Cabbage   | Screenhouse       | 51456.91                           | 8750                          | 5.88           |
|                | Lettuce   | Irrigated         | 51940.78                           | 1050                          | 49.47          |
|                | Lettuce   | Rainfed           | 44343.30                           | 375                           | 118.25         |
|                | Lettuce   | Screenhouse       | 38911.08                           | 12000                         | 3.24           |
|                | Spinach   | Irrigated         | 51940.78                           | 975                           | 53.27          |
|                | Spinach   | Rainfed           | 44343.30                           | 340                           | 130.42         |
|                | Spinach   | Screenhouse       | 38911.08                           | 13300                         | 2.93           |
| <b>Pulpy</b>   | Cucumber  | Irrigated         | 52566.58                           | 1100                          | 47.79          |
|                | Cucumber  | Rainfed           | 44969.10                           | 400                           | 112.42         |
|                | Cucumber  | Screenhouse       | 39536.88                           | 10500                         | 3.77           |
|                | Eggplant  | Irrigated         | 52566.58                           | 1150                          | 45.71          |
|                | Eggplant  | Rainfed           | 44969.10                           | 425                           | 105.81         |
|                | Eggplant  | Screenhouse       | 39536.88                           | 7600                          | 5.20           |
|                | Pumpkin   | Irrigated         | 51970.58                           | 1125                          | 46.20          |
|                | Pumpkin   | Rainfed           | 44969.10                           | 390                           | 115.31         |
|                | Pumpkin   | Screenhouse       | 39536.88                           | 5850                          | 6.76           |

Note: Data Source: Authors' calculations

<https://doi.org/10.1371/journal.pclm.0000745.t005>

In irrigated systems, leafy vegetables like cabbage, lettuce, and spinach require 1.91–4.33 million liters per hectare per season, while pulpy crops such as cucumber, eggplant, and pumpkin demand up to 8.05 million liters [55]. Rainfed farming uses less water overall but faces seasonal variability, with cabbage, lettuce, and spinach consuming 1.71–3.71 million liters per hectare, and pulpy vegetables requiring up to 6.88 million liters [56–58].

Screenhouse farming, despite higher daily water needs, operates on a smaller scale and uses far less water per season, e.g., cabbage at 61,280 liters, lettuce at 42,942 liters, and pumpkin at 123,480 liters due to controlled fertigation [59].

When measured per kilogram of produce, screenhouse systems are the most efficient: cabbage uses just 7.00 liters/kg, lettuce 3.58 liters/kg, and spinach 2.38 liters/kg (Table 4). Rainfed systems are least efficient, with cabbage requiring 10,625 liters/kg and pumpkin 17,628 liters/kg (Table 6). Irrigated farming falls in between, with cabbage at 4,331 liters/kg and pumpkin at 8,050 liters/kg [60].

Comparative studies support these findings. Ketema [61] found that irrigation users in Ethiopia achieved 90% technical efficiency compared to 74% for rainfed farmers. Bwire et al. [62] also confirmed that drip irrigation and poly-mulching significantly improve water efficiency. Overall, screenhouse farming offers the best balance of water efficiency and productivity, making it the most sustainable option for vegetable cultivation in water-scarce regions like Kudan LGA (Table 6).

#### 4. Discussion

The findings of this study strongly affirm the superiority of screenhouse vegetable farming over traditional rainfed and irrigated systems in terms of yield efficiency, cost-effectiveness, and environmental sustainability. Screenhouse farming supports multiple cropping cycles annually, enabling consistent market supply and significantly higher productivity. Leafy vegetables such as cabbage, lettuce, and spinach yielded 17,500 kg/ha, 24,000 kg/ha, and 26,600 kg/ha respectively,

**Table 6. Water Use (WU) Per Unit Product for Rainfed, Irrigated and Screenhouse Leafy and Pulpy Vegetable Production.**

| Vegetable Type | Vegetable | Production System | Area (ha) | Average Growing Period (Days) | Total Average Water Requirement per season (liter/season) | Saleable Product (kg/ha/yr) | Water Use (liter)/kg Product |
|----------------|-----------|-------------------|-----------|-------------------------------|-----------------------------------------------------------|-----------------------------|------------------------------|
| <b>Leafy</b>   | Cabbage   | Irrigated         | 1         | 82.5                          | 4331250                                                   | 1000                        | 4331.25                      |
|                | Cabbage   | Rainfed           | 1         | 87.5                          | 3718750                                                   | 350                         | 10625.00                     |
|                | Cabbage   | Screenhouse       | 0.0147    | 72.5                          | 61280.625                                                 | 8750                        | 7.00                         |
|                | Lettuce   | Irrigated         | 1         | 52.5                          | 2493750                                                   | 1050                        | 2375.00                      |
|                | Lettuce   | Rainfed           | 1         | 57.5                          | 2156250                                                   | 375                         | 5750.00                      |
|                | Lettuce   | Screenhouse       | 0.0147    | 47.5                          | 42942.375                                                 | 12000                       | 3.58                         |
|                | Spinach   | Irrigated         | 1         | 42.5                          | 1912500                                                   | 975                         | 1961.54                      |
|                | Spinach   | Rainfed           | 1         | 47.5                          | 1710000                                                   | 340                         | 5029.41                      |
|                | Spinach   | Screenhouse       | 0.0147    | 37.5                          | 31696.875                                                 | 13300                       | 2.38                         |
| <b>Pulpy</b>   | Cucumber  | Irrigated         | 1         | 57.5                          | 3018750                                                   | 1100                        | 2744.32                      |
|                | Cucumber  | Rainfed           | 1         | 62.5                          | 2656250                                                   | 400                         | 6640.63                      |
|                | Cucumber  | Screenhouse       | 0.0147    | 52.5                          | 48234.375                                                 | 10500                       | 4.59                         |
|                | Eggplant  | Irrigated         | 1         | 100                           | 5900000                                                   | 1150                        | 5130.43                      |
|                | Eggplant  | Rainfed           | 1         | 107.5                         | 5106250                                                   | 425                         | 12014.71                     |
|                | Eggplant  | Screenhouse       | 0.0147    | 90                            | 89302.5                                                   | 7600                        | 11.75                        |
|                | Pumpkin   | Irrigated         | 1         | 115                           | 8050000                                                   | 1125                        | 7155.56                      |
|                | Pumpkin   | Rainfed           | 1         | 125                           | 6875000                                                   | 390                         | 17628.21                     |
|                | Pumpkin   | Screenhouse       | 0.0147    | 105                           | 123480                                                    | 5850                        | 21.11                        |

Note: Data Source: Authors' calculations

<https://doi.org/10.1371/journal.pclm.0000745.t006>

while pulpy vegetables like cucumber, eggplant, and pumpkin reached 21,000 kg/ha, 15,200 kg/ha, and 11,700 kg/ha. These figures far exceed the 700–850 kg/ha in rainfed systems and 2,000–2,300 kg/ha in irrigated systems.

While these yield differences are largely attributed to the controlled environment and intensive cropping cycles of screenhouse systems, other agronomic variables likely contributed to the outcomes. One critical factor is the use of hybrid seed varieties in screenhouse farming such as Tycoon F1 cabbage and Greengo F1 cucumber which offer superior germination rates, disease resistance, and faster maturation compared to the open-pollinated varieties (OPVs) commonly used in rainfed and irrigated systems. Additionally, screenhouse farming typically involves more skilled labor, precise planting techniques, and consistent monitoring, which enhance plant health and reduce losses. In contrast, rainfed systems often rely on less intensive labor and are more vulnerable to environmental stressors such as erratic rainfall, pest outbreaks, and soil degradation.

From an economic standpoint, screenhouse farming delivers the lowest cost per kilogram of saleable produce ₦611/kg for cabbage, ₦445/kg for lettuce, ₦402/kg for spinach, ₦509/kg for cucumber, ₦703/kg for eggplant, and ₦913/kg for pumpkin compared to rainfed costs exceeding ₦1,700/kg and irrigated costs nearing ₦1,800/kg. To statistically validate these differences, a one-way ANOVA was conducted on cost per kilogram across farming systems. The results yielded an F-statistic of 58.42 and a p-value < 0.001, confirming that the differences are statistically significant. Screenhouse farming recorded the lowest mean cost per kilogram (₦597.17), reinforcing its economic advantage.

To assess the robustness of these findings under market variability, a sensitivity analysis was performed across four price scenarios (₦400, ₦600, ₦800, and ₦1000/kg). Screenhouse farming became profitable for most crops at ₦600–800/kg, while rainfed systems remained unprofitable even at ₦1000/kg due to low yields and high unit costs. Irrigated systems showed moderate profitability but required higher market prices to break even. For example, screenhouse lettuce yielded a profit of ₦4.26 million/ha at ₦800/kg, while rainfed lettuce remained in deficit even at ₦1000/kg. These results confirm that screenhouse farming is not only efficient but also resilient under fluctuating market conditions.

Environmental assessments further validate screenhouse's advantages. Water-use efficiency is markedly higher, with screenhouse spinach requiring only 2.38 liters/kg compared to 5,029 liters/kg in rainfed systems. Pulpy vegetables also show reduced water consumption per kilogram in screenhouse systems. Greenhouse gas emissions per kilogram of produce are lowest in screenhouse farming, with values ranging from 2.93 to 6.76 kg CO<sub>2</sub>-eq/kg, compared to emissions exceeding 100 kg CO<sub>2</sub>-eq/kg in rainfed systems. These metrics position screenhouse farming as the most sustainable option for resource optimization and climate resilience.

In summary, the integration of environmental control, improved seed genetics, skilled labor, and agronomic precision explains the compounded advantage of screenhouse farming. The statistical significance confirmed by ANOVA and the resilience demonstrated through sensitivity analysis further validate screenhouse farming as the most economically viable and environmentally efficient system. These insights suggest that future interventions should not only promote screenhouse infrastructure but also ensure access to high-quality inputs and technical training. Yield improvements in traditional systems may be possible through targeted upgrades in seed technology, labor capacity, and irrigation management—especially in regions where full screenhouse adoption may be financially or logistically constrained.

These findings should inform agricultural policy and investment strategies aimed at scaling sustainable vegetable production. Policymakers should prioritize support for screenhouse technologies, hybrid seed access, and precision irrigation systems. By aligning development efforts with evidence-based practices, Nigeria can build a more productive, resilient, and climate-smart agricultural sector ([Table 7](#)).

## 5. Conclusion

This study confirms that screenhouse vegetable farming offers the most viable and sustainable model for agricultural development in semi-arid regions like Kudan LGA. Across all six crops studied cabbage, lettuce, spinach, cucumber, eggplant, and pumpkin screenhouse systems consistently demonstrated superior performance in yield efficiency, cost-effectiveness, and environmental sustainability compared to traditional rainfed and irrigated farming systems.

**Table 7. Performance Metrics for Screenhouse, Rainfed Field, and Irrigated Field Leafy and Pulpy Vegetable Production.**

| Vegetable Type | Vegetable | Production System | Area (ha) | Total Cost of Production (₦/ha) | Yield (kg/ha/yr) | Saleable Product (kg/ha/yr) | Cost/Yield(₦/Kg) | CED (MJ/kg) | GWP/kg Product | Water Use (liter)/kg Product |
|----------------|-----------|-------------------|-----------|---------------------------------|------------------|-----------------------------|------------------|-------------|----------------|------------------------------|
| Leafy          | Cabbage   | Irrigated         | 1         | 2,034,145                       | 2,000            | 1,000                       | 2,034            | 1.90        | 52.57          | 4331.25                      |
|                | Cabbage   | Rainfed           | 1         | 698,972                         | 700              | 350                         | 1,997            | 0.57        | 128.48         | 10625.00                     |
|                | Cabbage   | Screenhouse       | 0.0147    | 5342973                         | 17,500           | 8,750                       | 611              | 0.22        | 5.88           | 7.00                         |
|                | Lettuce   | Irrigated         | 1         | 2,034,145                       | 2,100            | 1,050                       | 1,937            | 1.35        | 49.47          | 2375.00                      |
|                | Lettuce   | Rainfed           | 1         | 698,972                         | 750              | 375                         | 1,864            | 0.48        | 118.25         | 5750.00                      |
|                | Lettuce   | Screenhouse       | 0.0147    | 5,342,973                       | 24,000           | 12,000                      | 445              | 0.12        | 3.24           | 3.58                         |
|                | Spinach   | Irrigated         | 1         | 2,034,145                       | 1,950            | 975                         | 2,086            | 1.21        | 53.27          | 1961.54                      |
|                | Spinach   | Rainfed           | 1         | 698,972                         | 680              | 340                         | 2,056            | 0.41        | 130.42         | 5029.41                      |
|                | Spinach   | Screenhouse       | 0.0147    | 5,342,973                       | 26,600           | 13,300                      | 402              | 0.09        | 2.93           | 2.38                         |
| Pulpy          | Cucumber  | Irrigated         | 1         | 2,034,145                       | 2,200            | 1,100                       | 1,849            | 1.91        | 47.79          | 2744.32                      |
|                | Cucumber  | Rainfed           | 1         | 698,972                         | 800              | 400                         | 1,747            | 0.63        | 112.42         | 6640.63                      |
|                | Cucumber  | Screenhouse       | 0.0147    | 5,342,973                       | 21,000           | 10,500                      | 509              | 0.20        | 3.77           | 4.59                         |
|                | Eggplant  | Irrigated         | 1         | 2,034,145                       | 1,150            | 1,150                       | 1,769            | 1.67        | 45.71          | 5130.43                      |
|                | Eggplant  | Rainfed           | 1         | 698,972                         | 850              | 425                         | 1,645            | 0.52        | 105.81         | 12014.71                     |
|                | Eggplant  | Screenhouse       | 0.0147    | 5,342,973                       | 15,200           | 7,600                       | 703              | 0.25        | 5.20           | 11.75                        |
|                | Pumpkin   | Irrigated         | 1         | 2,034,145                       | 1,125            | 1,125                       | 1,808            | 2.62        | 46.20          | 7155.56                      |
|                | Pumpkin   | Rainfed           | 1         | 698,972                         | 780              | 390                         | 1,792            | 0.72        | 115.31         | 17628.21                     |
|                | Pumpkin   | Screenhouse       | 0.0147    | 5,342,973                       | 11,700           | 5,850                       | 913              | 0.50        | 6.76           | 21.11                        |

Note: Data Source: Authors' calculation

<https://doi.org/10.1371/journal.pclm.0000745.t007>

Yield data show that screenhouse farming supports multiple cropping cycles annually, resulting in significantly higher outputs. Leafy vegetables such as cabbage, lettuce, and spinach yielded 17,500 kg/ha, 24,000 kg/ha, and 26,600 kg/ha respectively, while pulpy vegetables like cucumber, eggplant, and pumpkin reached 21,000 kg/ha, 15,200 kg/ha, and 11,700 kg/ha. These figures far exceed the 700–850 kg/ha in rainfed systems and 2,000–2,300 kg/ha in irrigated systems.

Economic analysis further highlights screenhouse profitability. Cost per kilogram of saleable produce was lowest in screenhouse farming ₦611/kg for cabbage, ₦445/kg for lettuce, ₦402/kg for spinach, ₦509/kg for cucumber, ₦703/kg for eggplant, and ₦913/kg for pumpkin compared to rainfed costs exceeding ₦1,700/kg and irrigated costs nearing ₦1,800/kg. A one-way ANOVA confirmed that these differences are statistically significant, with an F-statistic of 58.42 and a p-value < 0.001, validating the cost-efficiency advantage of screenhouse systems.

To assess economic resilience, a sensitivity analysis was conducted across four market price scenarios (₦400, ₦600, ₦800, and ₦1000/kg). Screenhouse farming became profitable for most crops at ₦600–800/kg, while rainfed systems remained unprofitable even at ₦1000/kg due to low yields and high unit costs. Irrigated systems showed moderate profitability but required higher market prices to break even. These results confirm that screenhouse farming is not only efficient but also robust under fluctuating market conditions.

Environmental metrics further reinforce the superiority of screenhouse farming. Water-use efficiency was highest in screenhouse systems, with cabbage requiring only 7.00 liters/kg, lettuce 3.58 liters/kg, and spinach 2.38 liters/kg significantly lower than rainfed equivalents. Pulpy vegetables also showed reduced water consumption per kilogram in screenhouse systems. Greenhouse gas emissions per kilogram of produce were lowest in screenhouse farming, with values ranging from 2.93 to 6.76 kg CO<sub>2</sub>-eq/kg, compared to emissions exceeding 100 kg CO<sub>2</sub>-eq/kg in rainfed systems.

These findings have direct implications for agricultural policy and investment strategy. Policymakers should prioritize the integration of greenhouse technologies into national and regional agricultural development plans. Targeted subsidies, low-interest financing, and technical training programs can accelerate adoption among small-holder farmers. Additionally, investment in precision irrigation infrastructure such as drip systems and fertigation should be scaled to improve water efficiency and reduce energy demand in both greenhouse and open-field systems.

In conclusion, greenhouse farming offers a transformative pathway for achieving food security, economic resilience, and environmental sustainability. By aligning agricultural policy with evidence-based practices and directing investment toward climate-smart infrastructure, Nigeria can build a more productive and adaptive agricultural sector capable of meeting future challenges..

### 5.1. Limitations in vegetable production systems

Several challenges affect the efficiency and sustainability of rainfed, irrigated, and greenhouse production systems, impacting yield stability, environmental footprint, and economic feasibility. Key limitations include:

#### 1. Open-Pollinated Varieties (OPVs) in Open-Field Cultivation

**Inconsistent Growth and Yield Fluctuations:** OPVs often exhibit variability in germination rates, crop uniformity, and maturation periods, leading to lower yield predictability compared to hybrid varieties.

**Susceptibility to Pests and Diseases:** OPVs generally lack enhanced resistance to pathogens, increasing the risk of infestations and productivity losses, especially in rainfed farming where pest control is limited.

**Reduced Market Competitiveness:** Due to their lower yield potential and quality inconsistency, OPV-grown produce often fails to meet premium market standards, reducing commercial profitability.

#### 2. Flood Irrigation in Conventional Irrigated Farming

**High Water Waste and Inefficiency:** Flood irrigation results in substantial runoff and evaporation losses, with water-use efficiency dropping below 60% in most cases [55].

**Soil Degradation and Nutrient Leaching:** Excess water exposure compacts soil structures, disrupts root aeration, and leaches essential nutrients, leading to long-term fertility decline.

**Uneven Moisture Distribution:** Flood irrigation creates inconsistent soil saturation, causing drought stress or overwatering, both of which reduce crop uniformity and quality [62].

#### 3. High Installation Costs in Greenhouse Farming

**Capital-Intensive Infrastructure:** Establishing a fully controlled production system requires large investments in climate control technology, irrigation automation, and fertigation systems, leading to high startup expenses.

**Operational Costs and Energy Demand:** Maintaining optimal indoor conditions results in higher energy consumption, increasing overall production costs despite efficiency in unit yields [61].

**Limited Scalability for Small-Scale Farmers:** Due to installation and maintenance expenses, widespread adoption remains restricted, making greenhouse more viable for commercial-scale rather than smallholder farming.

#### 4. Emission Estimation Using Tier 1 IPCC, 2006 Data

**Generalized Assumptions in Carbon Accounting:** The Tier 1 methodology relies on standardized emission factors, which may overestimate or underestimate actual GHG outputs due to regional climate variations and soil differences.

Limited Consideration of Crop-Specific Factors: Variations in fertilizer application, organic matter decomposition, and irrigation methods are not fully integrated, reducing accuracy in estimating emissions per hectare.

Absence of Precision Mitigation Strategies: Tier 1 does not factor in modern mitigation techniques, such as carbon sequestration through regenerative practices, leading to potentially inflated emissions figures.

## 5.2. Recommendations

Adopt Hybrid Varieties Over OPVs to enhance yield stability, disease resistance, and market value, ensuring greater productivity per hectare.

Replace Flood Irrigation with Drip Systems to maximize water efficiency, reduce nutrient leaching, and prevent soil degradation, aligning with modern conservation strategies.

Improve screenhouse Cost-Effectiveness by integrating renewable energy sources, modular infrastructure designs, and adaptive climate control systems to lower startup and operational expenses.

Upgrade to Tier 2 or Higher Emission Accounting Methods for more crop-specific, regionally adjusted carbon assessments, increasing accuracy in environmental impact analysis.

## Supporting information

**S1 Text. Table A: Optimal conditions for the screen-house tomato production at Likoro in Kudan LGA of Kaduna State, Nigeria.** Table B: Characteristics of CEA, rainfed, and irrigated field operations for leafy and pulpy vegetables. Table C: Average Cost Per Hectare for Screenhouse, Rainfed, and Irrigated Leafy Vegetable (Cabbage, Lettuce, and Spinach) Production. Table D: Average cost per hectare for screenhouse, rainfed, and irrigated pulpy vegetable (cucumber, eggplant, and pumpkin) production. Table E: Average diesel pump energy usage in leafy and pulpy vegetable production. Table F: Average electric pump energy usage in leafy and pulpy vegetable production. Table G: Average GHG emissions from leafy and pulpy vegetable irrigated, rainfed, and screenhouse production. Table H: Total GWP calculation from rainfed, irrigated, and screenhouse leafy and pulpy vegetable production. Table I: Average water requirements for leafy and pulpy vegetable production.

(DOCX)

## Author contributions

**Conceptualization:** Taiwo Bintu Ayinde.

**Data curation:** Taiwo Bintu Ayinde.

**Formal analysis:** Taiwo Bintu Ayinde.

**Funding acquisition:** Taiwo Bintu Ayinde.

**Investigation:** Taiwo Bintu Ayinde.

**Methodology:** Taiwo Bintu Ayinde.

**Project administration:** Taiwo Bintu Ayinde.

**Resources:** Taiwo Bintu Ayinde.

**Software:** Taiwo Bintu Ayinde.

**Validation:** Taiwo Bintu Ayinde.

**Visualization:** Taiwo Bintu Ayinde.

**Writing – original draft:** Taiwo Bintu Ayinde.

**Writing – review & editing:** Taiwo Bintu Ayinde, Charles F. Nicholson, Benjamin Ahmed.

## References

1. Carbon B. Guest post: What 13,500 citations reveal about the IPCC's climate science report. <https://www.carbonbrief.org/guest-post-what-13500-citations-reveal-about-the-ipccs-climate-science-report/>. 2022.
2. Department of Agriculture US. Food Data Central. <https://fdc.nal.usda.gov/>. 2021. 2025 January 2.
3. Bhatti MHT, Sami A, Haider MZ, Shafiq M, Naeem S, Tariq MR, et al. Genetic Diversity of Vegetable Crops and Utilization in Food and Nutritional Security. Sustainable Development and Biodiversity. Springer Nature Singapore. 2024;171–97. [https://doi.org/10.1007/978-981-99-5245-8\\_6](https://doi.org/10.1007/978-981-99-5245-8_6)
4. Gardening Know How. Plant Spacing Guide - Information on Proper Vegetable Garden Spacing. <https://www.gardeningknowhow.com/edible/vegetables/vgen/plant-spacing-chart.htm>. 2023. 2025 May 2.
5. FAO. World Food and Agriculture – Statistical Yearbook 2023. 2023. Rome. <https://doi.org/10.4060/cc8166en>
6. FAO. FAO. <https://www.fao.org/home/en/?form=MG0AV3>. 2020. 2023 January 3.
7. Statista. Vegetables - Worldwide. 2025 <https://www.statista.com/outlook/com/food/vegetables/worldwide>. 2025 April 20.
8. Vegetable farming market size, share, growth, and industry analysis, by type (growing vegetable crops, producing vegetable seeds), by application (household, commercial) and regional forecast to 2033. Global Market Statistics. 2025. <https://www.globalmarketstatistics.com/market-reports/vegetable-farming-market-11425>
9. Wudil AH. Sustainable solutions to food insecurity in Nigeria: Perspectives on irrigation, crop-water productivity, and antecedents. Global agricultural production: Resilience to climate change. Cham: Springer. 2022.
10. Fadeyi OJ, Ayodeji OO. Comparative economic analysis of irrigated and rain-fed farming of amaranth (*Amaranthus cruentus* L.) – jute mallow (*Corchorus olitorus* L.) intercropping in savanna, Nigeria. Nigeria Agricultural Journal. 2023;54(1):352–7.
11. Kumarac K, Kumaric K, Acharya S, Tsewanga T, Mishraa A, Vermaa A, et al. Evaluation of spinach and lettuce production (growth, morphological characteristics, biomass yield, and nutritional quality) in NFT hydroponic system in greenhouse, room, and open environment at Leh, India. Eur Chem Bull. 2023;12(5):5421–35.
12. Weerahewa J, Dayananda D. Land use changes and economic effects of alternative fertilizer policies: A simulation analysis with a bio-economic model for a Tank Village of Sri Lanka. Agricultural Systems. 2023;205:103563. <https://doi.org/10.1016/j.agsy.2022.103563>
13. Nicholson CF, Eaton M, Gómez MI, Mattson NS. Economic and Environmental Performance of Controlled-Environment Supply Chains for Leaf Lettuce. European Review of Agricultural Economics. 2023. <https://doi.org/10.1093/erae/jabd016>
14. Jovanovic N, Pereira LS, Paredes P, Pôças I, Cantore V, Todorovic M. A review of strategies, methods and technologies to reduce non-beneficial consumptive water use on farms considering the FAO56 methods. Agricultural Water Management. 2020;239:106267. <https://doi.org/10.1016/j.agwat.2020.106267>
15. Obebe OO, Aluko OO, Falohun OO, Akinlabi KB, Onyiche TE. Parasitic contamination and public health risk of commonly consumed vegetables in Ibadan-Nigeria. Pan Afr Med J. 2020;36:126. <https://doi.org/10.11604/pamj.2020.36.126.19364> PMID: 32849981
16. Enguwa KBP, Horn LN, Awala SK, Glaser S. Assessment of the economic benefit of cabbage production under different irrigation levels and soil amendments in a semi-arid environment. J Exp Bio & Ag Sci. 2024;12(5):770–83. [https://doi.org/10.18006/2024.12\(5\).770.783](https://doi.org/10.18006/2024.12(5).770.783)
17. Fuentes-Peñailillo F, Gutter K, Vega R, Silva GC. New Generation Sustainable Technologies for Soilless Vegetable Production. Horticulturae. 2024;10(1):49. <https://doi.org/10.3390/horticulturae10010049>
18. Demir H, Kaman H, Sönmez İ, Uçan U, Akgün İH. Yield and Yield Parameters Response of Cabbage to Partial Root Drying and Conventional Deficit Irrigation. Agronomy. 2024;14(11):2721. <https://doi.org/10.3390/agronomy14112721>
19. Veggie C. Cucumber Yield per Acre in Nigeria. <https://veggieconcept.ng/cucumber-yield-per-acre-in-nigeria/>. 2022. 2025 April 20.
20. Weather Spark. Climate and Average Weather Year Round in Kaduna Nigeria. <https://weatherspark.com/y/55104/Average-Weather-in-Kaduna-Nigeria-Year-Round>. 2024.
21. Balana BB, Aghadi CN, Ogunniyi AI. Improving livelihoods through post-harvest loss management: evidence from Nigeria. Food Sec. 2021;14(1):249–65. <https://doi.org/10.1007/s12571-021-01196-2>
22. Jun Z, Franca UA, Iwuozor KO. Relationship Between Agricultural Production, Energy Consumption, and Climate Change in Nigeria. Climate Change Impacts on Nigeria. Cham: Springer. 2023. [https://doi.org/10.1007/978-3-031-21007-5\\_27](https://doi.org/10.1007/978-3-031-21007-5_27)
23. Dirisu JO, Oyedepo SO, Airhihen PI, Adelekan DS, Efemwenkiki UK, Khan A. Experimental Investigation of Used Vegetable Oil-Diesel Blends as Alternative to Fossil Fuel in Compression Ignition Engine. Sustainable Materials and Technology. Springer Nature Singapore. 2024. 73–93. [https://doi.org/10.1007/978-981-97-4561-6\\_4](https://doi.org/10.1007/978-981-97-4561-6_4)
24. Sarma U, Tr B. Dietary phytonutrients in common green leafy vegetables and the significant role of processing techniques on spinach: a review. Food Prod Process and Nutr. 2024;6(1). <https://doi.org/10.1186/s43014-023-00192-7>
25. Wechie E, Elenwa CO. Socioeconomic Factors Influencing the Adoption of Leafy Vegetable Technologies for Increased Vegetable Production in Akwa Ibom State, Nigeria. IJAES. 2024;10(6).
26. Acharya S, Kumar K, Sharma N, Tiwari VK, Chaurasia OP. Yield and quality attributes of lettuce and spinach grown in different hydroponic systems. Journal of Soil and Water Conservation. 2021;20(3):342–9. <https://doi.org/10.5958/2455-7145.2021.00043.6>
27. Plant Calculators. Vegetable Seed Calculator. <https://plantcalculators.com/crop-farming/vegetable-seed/>. 2025. 2025 May 2.

28. Rakha M, Prohens J, Taher D, Wu T, Solberg SØ. Eggplant (*Solanum melongena*, *S. aethiopicum* and *S. macrocarpon*) Breeding. *Advances in Plant Breeding Strategies: Vegetable Crops*. Cham: Springer. 2021. [https://doi.org/10.1007/978-3-030-66961-4\\_5](https://doi.org/10.1007/978-3-030-66961-4_5)
29. Alam I, Salimullah M. Genetic Engineering of Eggplant (*Solanum melongena* L.): Progress, Controversy and Potential. *Horticulturae*. 2021;7(4):78. <https://doi.org/10.3390/horticulturae7040078>
30. Das A, Rout BM, Datta S, Singh S, Munshi AD, Dey SS. Spinach (*Spinacia oleracea* L.) Breeding: From Classical to Genomics-Centric Approach. *Smart Plant Breeding for Vegetable Crops in Post-genomics Era*. Springer Nature Singapore. 2023. 117–42. [https://doi.org/10.1007/978-981-19-5367-5\\_6](https://doi.org/10.1007/978-981-19-5367-5_6)
31. Nigerian Price. Cost of 100 Units of Electricity in Nigeria. <https://nigerianprice.com/cost-of-100-units-of-electricity-in-nigeria/>. 2024. 2024 December 27.
32. Bintu AT, Fredrick NC, Ahmed B. A Review of Controlled Environment Agriculture (CEA) Vegetable Production in Africa with Emphasis on Tomatoes, Onions and Cabbage. *Agricultural Sciences*. IntechOpen. 2024. <https://doi.org/10.5772/intechopen.113249>
33. Bayley D. Controlled Environment Production of Romaine Lettuce (*Lactuca sativa*). 2020.
34. Energypedia. Sustainable Energy Use in Fruit and Vegetable Value Chains. [https://energypedia.info/wiki/Privacy\\_policy](https://energypedia.info/wiki/Privacy_policy). 2022. 2025 May 2.
35. Energypedia. Sustainable Energy for Pumping and Irrigation. [https://energypedia.info/wiki/Sustainable\\_Energy\\_for\\_Pumping\\_and\\_Irrigation](https://energypedia.info/wiki/Sustainable_Energy_for_Pumping_and_Irrigation). 2021. 2025 May 2.
36. Energypedia. Energy for Agriculture. 2020 [https://energypedia.info/wiki/Energy\\_for\\_Agriculture](https://energypedia.info/wiki/Energy_for_Agriculture). 2025 May 2.
37. FAO. Nigeria loses 50% of agricultural produce post-harvest. <https://www.pulse.ng/articles/news/local/nigeria-loses-50-of-agricultural-produce-post-harvest-fao-2024102810420135602>. 2024. 2025 April 28.
38. Home Gardening: Vegetable Plant Spacing A Full Guide. <https://gardeningtips.in/vegetable-plant-spacing-a-full-guide>. 2025. 2025 May 2.
39. Harvard TH. Chan School of Public Health. Department of Nutrition. <https://www.hsph.harvard.edu/nutritionsource/food-features/cabbage/>. 2021. 2023 January 3.
40. Myhre G, Shindell D, Bréon FM, Collins W, Fuglestedt J, Huang J, et al. Anthropogenic and Natural Radiative Forcing. *Climate Change 2013: The Physical Science Basis*. Cambridge, United Kingdom and New York, NY, USA: Cambridge University Press. 2013.
41. Intergovernmental Panel on Climate Change IPCC. Fifth Assessment Report, 2014 (AR5). Myhre, G., D. Shindell, F.-M. Bréon, W. Collins, J. Fuglestedt, J. Huang, D. Koch, J.-F. Lamarque, D. Lee, B. Mendoza, T. Nakajima, A. Robock, G. Stephens, T. Takemura and H. Zhang, 2013: Anthropogenic and Natural Radiative Forcing. In: *Climate Change 2013: The Physical Science Basis*. Contribution of Working Group I to the Fifth Assessment Report of the Intergovernmental Panel on Climate Change [Stocker, T.F., D. Qin, G.-K. Plattner, M. Tignor, S.K. Allen, J. Boschung, A. Nauels, Y. Xia, V. Bex and P.M. Midgley (eds.)]. Cambridge, United Kingdom and New York, NY, USA: Cambridge University Press. Retrieved [December 29th 2024]. Available from [https://ghgprotocol.org/sites/default/files/ghgp/Global-Warming-Potential-Values%20%28Feb%2016%202016%29\\_1.pdf?form=MG0AV3](https://ghgprotocol.org/sites/default/files/ghgp/Global-Warming-Potential-Values%20%28Feb%2016%202016%29_1.pdf?form=MG0AV3)
42. Das KS, Kumar RK, Mishra B, Sahoo SK. Adoption of Cabbage Cultivation Technology by the Farmers of Khordha District of Odisha, India. *AJAEES*. 2024;42(4):115–22. <https://doi.org/10.9734/ajaees/2024/v42i42401>
43. Nwanojuo MA, Anumudu CK, Onyeaka H. Impact of Controlled Environment Agriculture (CEA) in Nigeria, a Review of the Future of Farming in Africa. *Agriculture*. 2025;15(2):117. <https://doi.org/10.3390/agriculture15020117>
44. Plant C. Vegetable Yield Calculator. 2025. [2025 April 20]. <https://plantcalculators.com/crop-farming/vegetable-yield/>
45. Ugoo T. Variety of Lettuce (*Lactuca sativa* L.) Growth and Yield in Response to Various Organic Fertilizers in Makurdi, Nigeria. 2024. <https://doi.org/10.2139/ssrn.5003702>
46. Afri-Agri Products. Pumpkin Latin name: *Curcubita moschata* L. (butternut varieties); *Curcubita maxima* (pumpkin varieties). <https://www.afri-agri.com/pumpkin/>. 2025 April 21.
47. Nigerian Seed Portal. Nigerian Seed Portal Initiative. <https://www.seedportal.org.ng/variety.php?cropid=39&task=view>. 2025. 2025 April 21.
48. SME Guide. Eggplant Farming in Nigeria: Keys to Success in the Local and Export Markets. <https://smeguide.net/eggplant-farming-in-nigeria-keys-to-success-in-the-local-and-export-markets/>. 2025. 2025 April 21.
49. Eaves J, Eaves S. Comparing the Profitability of a Greenhouse to a Vertical Farm in Quebec. *Canadian J Agri Economics*. 2017;66(1):43–54. <https://doi.org/10.1111/cjag.12161>
50. Growing Vegetables and Fruits in Greenhouses and Indoor Farms (GLASE, 2024). Environmental Performance of Growing Vegetables and Fruits in Greenhouses and Indoor Farms. <https://glase.org/industry-news/environmental-performance-of-growing-vegetables-and-fruits-in-greenhouses-and-indoor-farms>
51. Central Bank of Nigeria. Monthly average exchange rates (January–March 2025). 2025. <https://www.cbn.gov.ng/rates/exrate.html>
52. IRENA statistics plus data from the following sources: UN SDG Database (original sources: WHO; World Bank; IEA; IRENA; and UNSD); UN World Population Prospects; UNSD Energy Balances; UN COMTRADE; World Bank World Development Indicators; EDGAR; REN21 Global Status Report; IEA-IRENA Joint Policies and Measures Database; IRENA Global Atlas; and World Bank Global Solar Atlas and Global Wind Atlas. Retrieve January 3, 2025 from [https://www.irena.org/-/media/Files/IRENA/Agency/Statistics/Statistical\\_Profiles/Africa/Nigeria\\_Africa\\_RE\\_SP.pdf](https://www.irena.org/-/media/Files/IRENA/Agency/Statistics/Statistical_Profiles/Africa/Nigeria_Africa_RE_SP.pdf)
53. Wang KH, Sugano J, Fukuda S, Uyeda J, Meyer D, Ching S. DIY screenhouse for insect management in the tropics: Part I. Hānai’Ai Newsletter. 2017;28(Dec, Jan, Feb 2017).

54. Amoako Ofori P, Owusu-Nketia S, Opoku-Agyemang F, Agbleke D, Naalamle Amissah J. Greenhouse Tomato Production for Sustainable Food and Nutrition Security in the Tropics. *Tomato - From Cultivation to Processing Technology*. IntechOpen. 2022. <https://doi.org/10.5772/intechopen.105853>
55. Nicholson CF, Harbick K, Gómez MI, Mattson NS. An Economic and Environmental Comparison of Conventional and Controlled Environment Agriculture (CEA) Supply Chains for Leaf Lettuce to US Cities. In: Aktas E, Bourlakis M. (eds). *Food Supply Chains in Cities*. Cham: Palgrave Macmillan. 2020. [https://doi.org/10.1007/978-3-030-34065-0\\_2](https://doi.org/10.1007/978-3-030-34065-0_2)
56. Omorogbe P. Epileptic power supply costs Nigeria ₦10 trillion annually. *Nigeria Tribune*. 2021.
57. Gain health. Impact Story 20: Reducing Postharvest Losses in Fresh Fruits and Vegetables in Nigeria. 2022. <https://www.gainhealth.org/sites/default/files/publications/documents/20-Impact%20Stories-31Oct22.pdf>
58. de Brauw A, Bulte E. Storage and Post-harvest Losses. *Palgrave Studies in Agricultural Economics and Food Policy*. Springer International Publishing. 2021. 129–54. [https://doi.org/10.1007/978-3-030-88693-6\\_7](https://doi.org/10.1007/978-3-030-88693-6_7)
59. Olabisi O, Nofiu A. Principles for the Production of Tomatoes in the Greenhouse. *Tomato - From Cultivation to Processing Technology*. IntechOpen. 2022. <https://doi.org/10.5772/intechopen.106975>
60. Ritchie H, Roser M, Rosado P. CO<sub>2</sub> and greenhouse gas emissions. *Our World in Data*. <https://ourworldindata.org/co2-and-greenhouse-gas-emissions>. 2020. 2025 January 3.
61. Ketema K. Comparative analysis of economic efficiency of irrigated and rain-fed vegetable production in Kersa district of East Hararghe Zone, Oromia, Ethiopia. *Journal of Economics and Sustainable Development*. 2021;12(5).
62. Bwire D, Watanabe F, Suzuki S, Suzuki K. Improving Irrigation Water Use Efficiency and Maximizing Vegetable Yields with Drip Irrigation and Poly-Mulching: A Climate-Smart Approach. *Water*. 2024;16(23):3458. <https://doi.org/10.3390/w16233458>
